# Supplementary material
Source: MDPI journal article supplement (https://www.mdpi.com/1999-4907/15/1/199)
Supplement: s1 [file s1 › forests-2817958-supplementary.pdf]

# **Urban Dominant Trees Followed the Optimal Partitioning Theory and Increased Root Biomass Allocation and Nutrient Uptake under Elevated Nitrogen Deposition**

**Qinze Zhang, Jiyou Zhu, Jiaan Liang, Meiyang Li, Shuo Huang and Hongyuan Li \***

College of Environmental Science and Engineering, Nankai University, Tianjin 300350, China; zhangqinze1999@163.com (Q.Z.); zhujiy@nankai.edu.cn (J.Z.); oneand@mail.nankai.edu.cn (J.L.); limeiyangal@163.com (M.L.); 2111429@mail.nankai.edu.cn (S.H.)

\* Correspondence: eialee@nankai.edu.cn

**Table S1.** List of plant functional traits selected

| Trait                     | Unit               | Description             | Characteristic       | Function                                                                        |
|---------------------------|--------------------|-------------------------|----------------------|---------------------------------------------------------------------------------|
| <b>Aboveground traits</b> |                    |                         |                      |                                                                                 |
| SLA                       | cm <sup>2</sup> /g | Specific leaf area      | Morphology           | Assimilate utilization, Light interception, Palatability, Space niche in canopy |
| LA                        | cm <sup>2</sup>    | Leaf area               | Morphology           | Light interception                                                              |
| LT                        | cm                 | Leaf thickness          | Morphology           | Water storage, Palatability                                                     |
| LDMC                      | %                  | Leaf dry matter content | Morphology           | Assimilate utilization, Palatability, Decomposability                           |
| LTD                       | g/cm <sup>3</sup>  | Leaf tissue density     | Morphology           | Assimilate utilization, Decomposability, Resource storage                       |
| LNC                       | %                  | Leaf N content          | Chemical composition | Photosynthetic capacity, Palatability                                           |
| LCC                       | %                  | Leaf C content          | Chemical composition | Assimilate utilization, Leaf architecture                                       |
| LCC/LNC                   | %                  | Leaf C/N ratio          | Chemical composition | Leaf growth resource limitation                                                 |
| PL                        | cm                 | Plant height            | Morphology           | Light interception, Avoidance                                                   |

---

|                           |                    |                       |                      |                                                                                      |
|---------------------------|--------------------|-----------------------|----------------------|--------------------------------------------------------------------------------------|
| <b>Belowground traits</b> |                    |                       |                      |                                                                                      |
| SRL                       | cm/g               | Specific root length  | Morphology           | Assimilate utilization, Nutrient uptake, Space niche in soil, Root forage efficiency |
| SRA                       | cm <sup>2</sup> /g | Specific root area    | Morphology           | Assimilate utilization, Nutrient uptake, Space niche in soil                         |
| RL                        | cm                 | Root length           | Morphology           | Space niche in soil, Nutrient acquisition strategy                                   |
| RA                        | cm <sup>2</sup>    | Root area             | Morphology           | Space niche in soil, Nutrient acquisition strategy                                   |
| RNC                       | %                  | Root N content        | Chemical composition | Efficiency of nitrogen transport and utilization                                     |
| RCC                       | %                  | Root C content        | Chemical composition | Efficiency of carbon transport and utilization, Root architecture                    |
| RCC/RNC                   | %                  | Root C/N ratio        | Chemical composition | Root growth resource limitation, Soil nutrient resource limitation                   |
| RTD                       | g/cm <sup>3</sup>  | Root tissue density   | Morphology           | Assimilate utilization, Water transport, Resource storage                            |
| BRI                       | cm <sup>-1</sup>   | Branching intensity   | Morphology           | Fungal colonization                                                                  |
| RD                        | cm                 | Average root diameter | Morphology           | Growth time strategy, Life span                                                      |

---

**Table S2.** Effects of N addition (no, low, and high N) and tree species (*Pinus tabuliformis* and *Fraxinus chinensis*) on plant biomass (aboveground, belowground and total biomass) and root-shoot ratio. Asterisks were added to *P* values at the levels of “\*\*\*” for *P* < 0.001, “\*\*” for *P* < 0.01, and “\*” for *P* < 0.05.

| Variable            | N addition (N) |                      | Tree species (T) |                      | N × T   |                      |
|---------------------|----------------|----------------------|------------------|----------------------|---------|----------------------|
|                     | F value        | <i>P</i> value       | F value          | <i>P</i> value       | F value | <i>P</i> value       |
| Aboveground biomass | 5.701          | <b>0.008**</b>       | 21.000           | <b>&lt; 0.001***</b> | 0.058   | 0.944                |
| Belowground biomass | 19.756         | <b>&lt; 0.001***</b> | 247.414          | <b>&lt; 0.001***</b> | 9.738   | <b>&lt; 0.001***</b> |
| Total biomass       | 10.648         | <b>&lt; 0.001***</b> | 83.122           | <b>&lt; 0.001***</b> | 1.095   | 0.348                |
| Root-shoot ratio    | 35.690         | <b>&lt; 0.001***</b> | 770.730          | <b>&lt; 0.001***</b> | 17.940  | <b>&lt; 0.001***</b> |

**Table S3.** Effects of N addition (no, low, and high N) and tree species (*Pinus tabuliformis* and *Fraxinus chinensis*) on aboveground traits including leaf area (LA), specific leaf area (SLA), leaf thickness (LT), plant height (PL), leaf dry matter content (LDMC), and leaf tissue density (LTD) of *Pinus tabuliformis* and *Fraxinus chinensis*. Asterisks were added to *P* values at the levels of “\*\*\*” for *P* < 0.001, “\*\*” for *P* < 0.01, and “\*” for *P* < 0.05.

| Variable | N addition (N) |                | Tree species (T) |                    | N × T   |                |
|----------|----------------|----------------|------------------|--------------------|---------|----------------|
|          | F value        | <i>P</i> value | F value          | <i>P</i> value     | F value | <i>P</i> value |
| LA       | 1.284          | 0.292          | 129.884          | < <b>0.001</b> *** | 1.392   | 0.264          |
| SLA      | 1.191          | 0.318          | 31.604           | < <b>0.001</b> *** | 3.524   | <b>0.042</b> * |
| LT       | 0.971          | 0.390          | 150.075          | < <b>0.001</b> *** | 0.567   | 0.573          |
| PL       | 1.912          | 0.165          | 125.337          | < <b>0.001</b> *** | 2.438   | 0.104          |
| LDMC     | 4.005          | <b>0.029</b> * | 8.696            | <b>0.006</b> **    | 3.128   | 0.058          |
| LTD      | 3.983          | <b>0.029</b> * | 0.010            | 0.920              | 3.099   | 0.060          |

**Table S4.** Effects of N addition (no, low, and high N) and tree species (*Pinus tabuliformis* and *Fraxinus chinensis*) on belowground traits including root length (RL), specific root length (SRL), root area (RA), specific root area (SRA), average root diameter (RD), root tissue density (RTD) and branching intensity (BRI) of *Pinus tabuliformis* and *Fraxinus chinensis*. Asterisks were added to *P* values at the levels of “\*\*\*” for *P* < 0.001, “\*\*” for *P* < 0.01, and “\*” for *P* < 0.05.

| Variable | N addition (N) |                      | Tree species (T) |                      | N × T   |                      |
|----------|----------------|----------------------|------------------|----------------------|---------|----------------------|
|          | F value        | <i>P</i> value       | F value          | <i>P</i> value       | F value | <i>P</i> value       |
| RL       | 8.329          | <b>0.001**</b>       | 2.798            | 0.105                | 1.948   | 0.160                |
| SRL      | 39.450         | <b>&lt; 0.001***</b> | 24.580           | <b>&lt; 0.001***</b> | 29.200  | <b>&lt; 0.001***</b> |
| RA       | 5.533          | <b>0.009**</b>       | 6.860            | <b>0.014*</b>        | 2.821   | 0.075                |
| SRA      | 24.850         | <b>&lt; 0.001***</b> | 15.310           | <b>&lt; 0.001***</b> | 19.750  | <b>&lt; 0.001***</b> |
| RD       | 4.251          | <b>0.024*</b>        | 2.640            | 0.115                | 4.947   | <b>0.014*</b>        |
| RTD      | 7.307          | <b>0.003**</b>       | 2.869            | 0.101                | 3.372   | <b>0.048*</b>        |
| BRI      | 0.388          | 0.682                | 8.212            | <b>0.008**</b>       | 2.204   | 0.128                |

**Table S5.** Effects of N addition (no, low, and high N) and tree species (*Pinus tabuliformis* and *Fraxinus chinensis*) on nutrient traits including leaf carbon content (LCC), leaf nitrogen content (LNC), root carbon content (RCC), root nitrogen content (RNC), LCC/LNC, and RCC/RNC of *Pinus tabuliformis* and *Fraxinus chinensis*. Asterisks were added to *P* values at the levels of “\*\*\*” for *P* < 0.001, “\*\*” for *P* < 0.01, and “\*” for *P* < 0.05.

| Variable | N addition (N) |                   | Tree species (T) |                   | N × T   |                   |
|----------|----------------|-------------------|------------------|-------------------|---------|-------------------|
|          | F value        | <i>P</i> value    | F value          | <i>P</i> value    | F value | <i>P</i> value    |
| LCC      | 0.851          | 0.437             | 1.502            | 0.230             | 4.953   | <b>0.014*</b>     |
| RCC      | 4.558          | <b>0.019*</b>     | 22.155           | < <b>0.001***</b> | 0.319   | 0.729             |
| LNC      | 21.810         | < <b>0.001***</b> | 123.190          | < <b>0.001***</b> | 12.280  | < <b>0.001***</b> |
| RNC      | 32.767         | < <b>0.001***</b> | 51.812           | < <b>0.001***</b> | 0.296   | 0.746             |
| LCC/LNC  | 16.476         | < <b>0.001***</b> | 278.604          | < <b>0.001***</b> | 0.494   | 0.615             |
| RCC/RNC  | 11.661         | < <b>0.001***</b> | 7.768            | <b>0.009**</b>    | 0.255   | 0.777             |

(a)

*Pinus tabulaeformis*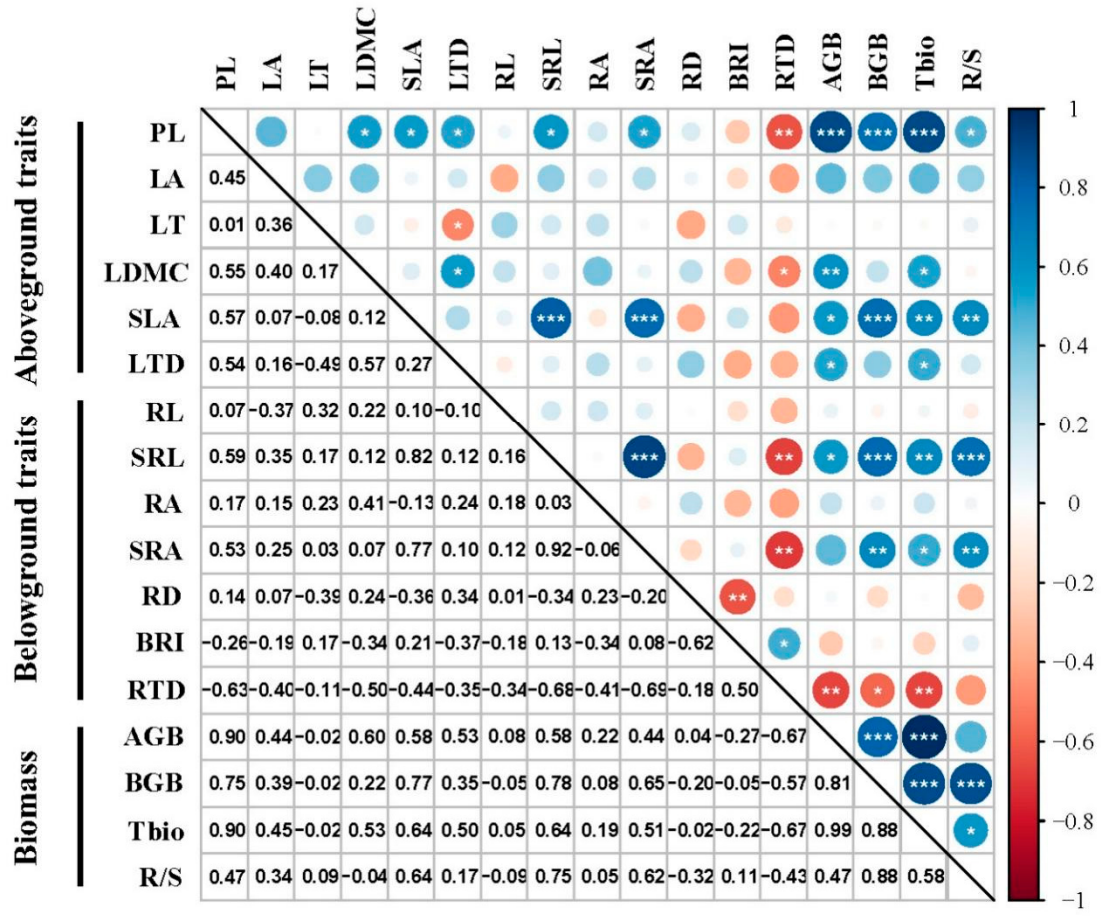

(b)

*Fraxinus chinensis*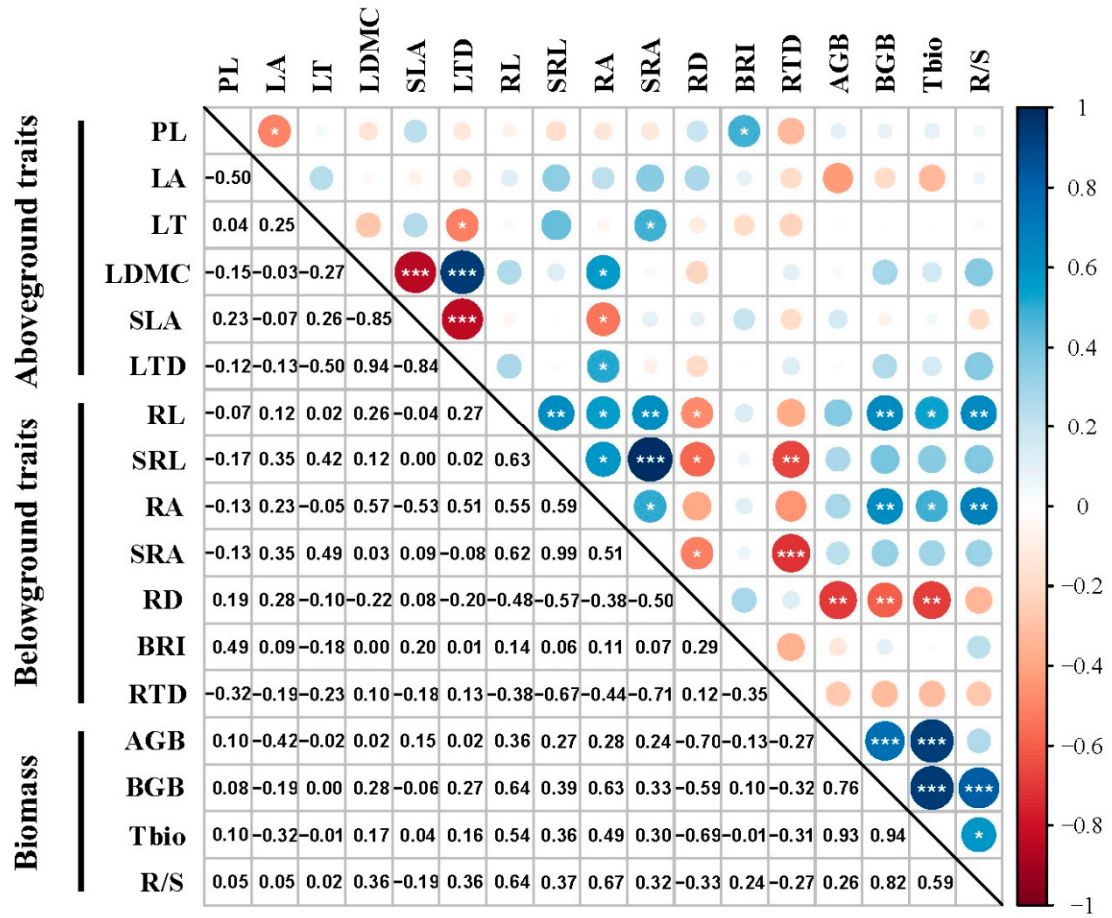

**Figure S1.** Correlation matrix of plant functional traits and biomass of *Pinus tabuliformis* (a) and *Fraxinus chinensis* (b). In total, 17 trait indexes are used in this analysis: aboveground traits include plant height (PL), leaf area (LA), leaf thickness (LT), leaf dry matter content (LDMC), specific leaf area (SLA), and leaf tissue density (LTD); belowground traits include root length (RL), specific root length (SRL), root area (RA), specific root area (SRA), average root diameter (RD), branching intensity (BRI), and root tissue density (RTD); biomass traits include aboveground biomass (AGB), belowground biomass (BGB), total biomass (Tbio) and root-shoot biomass ratio (R/S). The lower triangle shows Pearson correlation coefficients, which are illustrated by the color in the upper triangle. The size of the circle in the upper triangle indicates the *P* value of the correlation, with asterisks added to significant results for *P* values at the levels of “\*\*\*” for *P* < 0.001, “\*\*” for *P* < 0.01, and “\*” for *P* < 0.05.

## *Fraxinus chinensis*

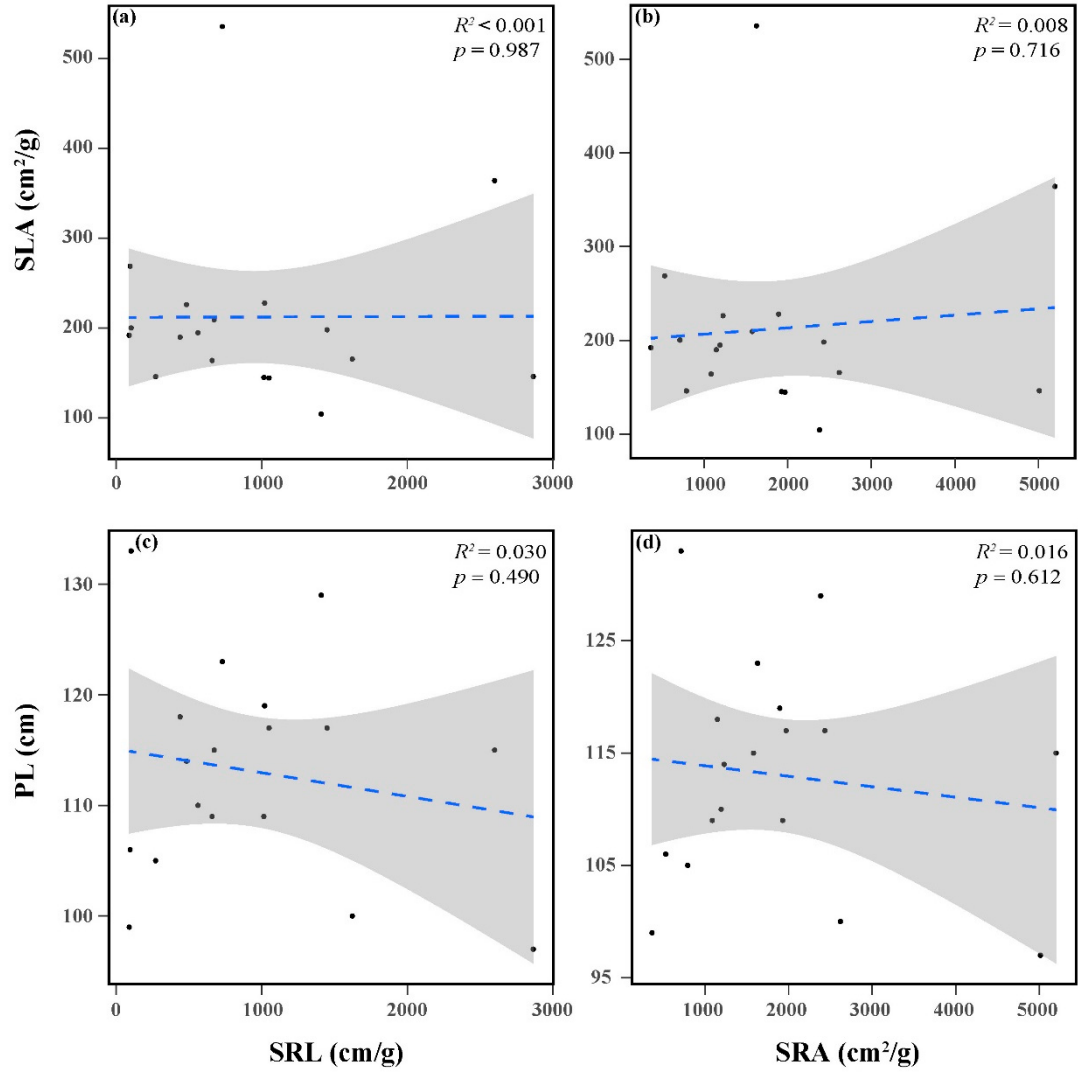

**Figure S2.** Relationships between SLA and SRL (a), SLA and SRA (b), PL and SRL (c), PL and SRA (d) of *Fraxinus chinensis*. Trait acronyms: SLA = specific leaf area, PL = plant height, SRL = specific root length, SRA = specific root area. The  $R^2$  (coefficient of determination), and  $p$ -values are obtained from the linear regression analyses. Shaded areas show a 95% confidence interval of the fit test.
